# Supplementary material
Source: Elsevier journal article supplement (https://www.sciencedirect.com/science/article/pii/S1134009616301115)
Supplement: mmc1 [file S1134009616301115:mmc1.docx]

**ANEXO I**

| Cuestionario enviado a los servicios de Cirugía cardiovascular para elaborar el registro de intervenciones de la SECTCV | |  | |  |  | |
| --- | --- | --- | --- | --- | --- | --- |
| 1. **CARDIOPATÍAS ADQUIRIDAS CON CIRCULACIÓN EXTRACORPÓREA** | |  | | | | |  | |  |
| 1.1 VALVULARES AISLADOS CON CEC | |
| 1.1.1 *Válvula aislada* |  | |
| - Sustitución Aórtica |
| - Sustitución Mitral |
| - Sustitución Tricúspide |
| - Sustitución Pulmonar |
| - Aórtica Reparación |
| - Mitral Reparación |
| - Tricúspide Reparación |
| - Pulmonar Reparación |
| 1.1.2 *Dos o más válvulas* |
| - Sustitución de dos válvulas |
| - Sustitución de una válvula y reparación de otra |
| - Reparación de dos válvulas |
| - Cirugía Sobre tres o más válvulas |
| 1.1.3 *Valvulares + revascularización* |
| - Prótesis aórtica + Derivación coronaria |
| - Plastia aórtica + Derivación coronaria |
| - Prótesis Mitral + Derivación coronaria |
| - Plastia mitral + Derivación coronaria |
| - Dos o más válvulas + Derivación coronaria |
| 1.1.4 *Tipo de protesis utilizadas* |
| - Prótesis mecánicas |
| - Prótesis biológicas |
| - Anillos protésicos |
| - Homoinjertos |
| - Prótesis vasculares con válvula mecánica |
| - Prótesis vascular con válvula biológica |
|  |
| 1.2 CIRUGIA CORONARIA CON CEC |
| 1.2.1 *Cirugía de revascularización aislada* |
| - Una derivación |
| - Dos derivaciones |
| - Tres derivaciones |
| - Cuatro derivaciones |
| - Cinco o más derivaciones |
| - Pacientes con un injerto arterial |
| - Pacientes con más de un injerto arterial |
|  |
| 1.2.2 *Cirugía complicaciones mecánicas del infarto agudo de miocardio* |
| - Aneurisma ventricular con o sin revascularización |
| - Comunicación interventricular con o sin revascularización |
| - Ruptura cardíaca con o sin revascularización |
| - Insuficiencia mitral aguda con o sin revascularización |
|  |
|  |
| 1.3 CIRUGIA DE LA AORTA CON CEC |
| 1.3.1 *Cirugía de la aorta electiva* |
| - Sustitución aorta ascendente sin sustitución valvular aórtica (suprasinusal) |
| - Sustitución aorta ascendente con reparación valvular aórtica (suprasinusal + reparación) |
| - Sustitución aorta ascendente con sustitución valvular aórtica (suprasinusal + prótesis mecánica) |
| - Sustitución aorta ascendente con sustitución valvular aórtica (suprasinusal + prótesis biológica) |
| - Reemplazo de raíz aórtica (Bono-Bentall mecánico) |
| - Reemplazo de raíz aórtica (Bono-Bentall biológica) |
| - Sustitución arco aórtico aislado |
| - Sustitución parcial de arco aórtico y/o asociada a otros segmentos |
| - Sustitución aorta descendente |
| - Remodelado de raíz aórtica (Yacoub y variantes) |
| - Reimplantación de raíz aórtica (David y variantes) |
| - Intervención tipo Ross (y variantes) |
| - Aneurisma de aorta torácica descendente abierto con CEC |
| - Aneurisma toracoabdominal con CEC |
| - Cirugía de la aorta torácica asociada a revascularización miocárdica |
| - Cirugía de la aorta torácica asociada a otra valvulopatía |
|  |
| 1.3.2 *Síndrome aórtico agudo* |
| - Disección Tipo A |
| - Disección Tipo B |
| - Ruptura traumática aorta torácica |
|  |
|  |
| 1.4 OTROS PROCEDIMIENTOS CON CEC (MISCELANEA) |
| - Trasplante cardíaco |
| - Trasplante cardiopulmonar |
| - Cirugía arritmias con CEC No asociados a otros procedimientos |
| - Tumores cardíacos |
| - Implantación asistencia ventricular con CEC |
| - Cirugía de arritmias asociado o no a otro procedimiento - Otros |
|  |
| 1.5 OTROS ASPECTOS |
| - Toracotomías/Esternotomías mini-invasivas utilizadas |
| - Revascularización con Láser asociado o no a derivación |
| - Técnica Port-Access |
|  |
|  |
| 2. **CIRUGIA CONGENITOS CON CEC** |  | |
| - Comunicación interauricular | |  | | | | |  | |  |
| - Drenaje venoso pulmonar anómalo +/- Comunicación interauricular | |
| - Drenaje Venoso pulmonar anómalo total | |
| - Comunicación interventricular (incluye doble salida del ventrículo derecho sin estenosis pulmonar) | |
| - Defecto parcial del septo aurículoventricular (ostium primum y transicional) | |
| - Defecto completo del septo aurículoventricular | |
| - Tetralogía de Fallot o situación Fallot (incluye atresia pulmonar +CIV y doble salida del ventrículo derecho tipo Fallot) | |
| - Atresia pulmonar+CIV+grandes colaterales aortopulmonares | |
| - Trasposición de grandes arterias con septo intacto | |
| - Trasposición de grandes arterias compleja (asociada a CIV y/o arco y/o estenosis pulmonar) | |
| - Truncus arterioso | |
| - Estenosis aórtica discreta subvalvular (Membrana; Miomectomía) | |
| - Estenosis aórtica supravalvular | |
| - Sustitución valvular aórtica | |
| - Plastia valvular aórtica | |
| - Reemplazo de raiz aórtica (Ross y Ross-Konno) | |
| - Reemplazo de raiz aórtica (Bentall- Bentall-Konno) | |
| - Técnicas de remodelado y reemplazo de raiz (Yacoub, David y variantes) | |
| - Sustitución valvular mitral | |
| - Plastia valvular mitral | |
| - Sustitución valvular tricuspídea | |
| - Plastia valvular tricuspídea aislada | |
| - Válvula pulmonar plastia | |
| - Válvula pulmonar sustitución | |
| - Procedimientos sobre dos válvulas | |
| - Procedimientos sobre tres o más válvulas | |
| - Glenn | |
| - Fontan y variantes | |
| - Conversión de Fontan | |
| - Cirugía arco aórtico (interrupción, hipoplasia) | |
| - Arteria coronaria izquierda anómala saliendo del tronco pulmonar y anomalías coronarias | |
| - Fístula sistémico pulmonar con CEC | |
| - Norwood y variantes para el corazón izquierdo hipoplásico | |
| - Trasplante cardíaco | |
| - Trasplante cardiopulmonar | |
| - Otros con CEC | |
| - Pacientes congénitos menores de 1 mes con CEC | |
| - Pacientes congénitos mayores de 18 años con CEC | |
|  | |
| 3.**CIRUGÍA SIN CIRCULACIÓN EXTRACORPÓREA** | |
| 3.1 CORONARIOS | |
| - Una derivación | |
| - Dos derivaciones | |  | | | |  | |
| - Tres o más derivaciones | |
| - Pacientes con un injerto arterial - Pacientes con más de un injerto arterial | |
| 3.2 CONGENITOS | |
| - Fistulas sistémico-pulmonares | |
| - Cerclaje de arteria pulmonar | |
| - Coartación de aorta | |
| - Ductus <2,5 kg | |
| - Ductus >2,5 kg | |
| - Reparación de anillo vascular | |
| - Otros | |
| - Pacientes congénitos menores de 1 mes sin CEC | |
| - Pacientes congénitos mayores de 18 años sin CEC | |
| 3.3 OTRO TIPO DE PROCEDIMIENTOS | |
| (MISCELANEA) | |
| - Implantación de marcapasos | |
| - Cambio generador marcapasos | |
| - Implantación desfibrilador | |
| - Cambio generador desfibrilador | |
| - Ventana Pericárdica/Pericardiocentesis | |
| - Pericardiectomia | |
| - Reoperaciones por sangrado | |
| - Reintervenciones por mediastinitis | |
| - Reintervenciones por dehiscencia esternal | |
| - Asistencia ventricular sin CEC | |
| - Rotura de pared libre postinfarto sin CEC con o sin revascularización | |
| - ECMO | |
| - Válvula transcateter via apical | |
| - Válvula transcateter via femoral o vascular | |
| - Otros | |
|  | |
|  | |
| 4. **CIRUGÍA VASCULAR PERIFERICA** | |
| 4.1 CIRUGÍA ARTERIAL | |
| - Cirugía de revascularización del sector aorto-ilíaco | |
| - Cirugía de revascularización del sector femoropoplíteo y distal | |  | | | |  | |
| - Combinaciones | |
| - Cirugía troncos supra-aórticos | |
| - Simpatectomía lumbar | |
| 4.2 ANEURISMAS | |
| - Aneurisma aorta torácica abiertos sin CEC | |
| - Aneurisma de aorta torácica con endoprótesis | |
| - Aneurisma toracoabdominal abiertos sin CEC | |
| - Aneurisma de aorta toracoabdominal o yuxtarrenal con endoprótesis | |
| - Aneurisma aorta abdominal abiertos | |
| - Aneurisma de aorta abdominal con endoprótesis | |
| - Aneurisma arterias periféricas | |
|  | |
| 4.3 OTROS | |
| - Cirugía venosa | |
| - Amputaciones | |
| - Fistulas AV | |
| - Embolectomia | |
| - Trauma arterial | |
| - Otros | |
| - Combinaciones anteriores | |
|  | |
| **5. ACTIVIDAD ANUAL POR CIRUJANO/AÑO** | |
| 5.1 Número de intervenciones cirugía cardíaca mayor. Staff | |
| - Staff 1, Staff2, Staff 3, Staff 4, Staff 5, Staff 6, Staff 7, Staff 8, Staff 9, Staff 10 | |
| - Número de Staffs en el servicio | |
|  | |
| 5.2 Número de intervenciones cirugía cardíaca mayor. Residente (INTERVENCIONES MAYORES) / AÑO | |
| - Residente 5º año, 4º año, 3º año, 2º año, 1º año | |
| - Otros residentes o becarios | |
| - Número de residentes/becarios en el servicio | |
|  | |
| 5.3 DEMANDAS JUDICIALES | |
|  | |
| - Demandas civiles en 2015 | |
| - Demandas penales en 2015 | |

**ANEXO II.**RELACIÓN DE HOSPITALES QUE ENVIARON SUS DATOS AL REGISTRO DE LA SECTCV DEL AÑO 2015.

1. **Hospital Universitario de Canarias.** La Laguna. Sta. Cruz de Tenerife.
2. **Hospital Universitario Virgen del Rocío (Adultos e Infantil).** Sevilla.
3. **Hospiten Rambla.** Santa Cruz de Tenerife.
4. **Hospital Universitario Fundación Jiménez Díaz y Hospital Universitario Rey Juan Carlos.** Madrid.
5. **Hospital Universitario Virgen de la Victoria.** Málaga.
6. **Policlínica Miramar.** Palma de Mallorca.
7. **Hospital Clínico Universitario de Santiago.** Santiago de Compostela. A Coruña.
8. **Clínica Los Manzanos.** Logroño
9. **Clínica Quirón salud.** Albacete
10. **Complejo Hospitalario de Toledo.** Toledo.
11. **Grupo Cardiovascular**. Málaga
12. **Hospital 12 de Octubre. (Adultos).** Madrid.
13. **Hospital Álvaro Cunqueiro.** Vigo.
14. **Hospital Universitari Germans Trias i Pujol (Can Ruti).** Badalona. Barcelona
15. **Hospital Universitario Clínico San Carlos.** Madrid.
16. **Hospital Clínico Universitario de Valladolid.** Valladolid.
17. **Hospital de Basurto.** Bilbao**.** Vizcaya.
18. **Hospital Universitario de La Princesa.** Madrid.
19. **Hospital Universitario de León.** León.
20. **Complejo Hospitalario de Navarra.** Navarra.
21. **Hospital General de Cataluña.** Sant Cugat. Barcelona.
22. **Hospital Universitario La Paz (Infantil).** Madrid.
23. **Hospital General de Alicante.** Alicante.
24. **Hospital General Universitario de Valencia.** Valencia.
25. **Hospital Universitario Gregorio Marañón (Adultos).** Madrid.
26. **Hospital Universitario Gregorio Marañón (Infantil).** Madrid.
27. **Hospital Universitario La Fé (Infantil).** Valencia.
28. **Hospital Universitario Ramón y Cajal (Infantil).** Madrid.
29. **Hospital Universitario La Fé (Adultos).** Valencia.
30. **Hospital Universitario La Paz (Adultos).** Madrid.
31. **Complejo Hospitalario Universitario materno infantil de Las Palmas.** Gran Canaria
32. **Hospital Universitario Miguel Servet.** Zaragoza.
33. **Hospital Universitario Puerta de Hierro-Majadahonda.** Madrid.
34. **Hospital Ramón y Cajal. (Adultos).** Madrid.
35. **Hospital Regional Universitario Carlos Haya.** Málaga.
36. **Hospital Sant Joan de Déu.** Barcelona.
37. **Hospital de Sant Pau.** Barcelona.
38. **Hospital Universitario Son Espases.** Palma de Mallorca.
39. **Hospital Universitario Central de Asturias.** Oviedo. Asturias.
40. **Hospital Universitario Dr. Negrín.** Las Palmas de Gran Canaria
41. **Hospital Universitario Quirón salud.** Madrid.
42. **Hospital Universitario Virgen de la Arrixaca.** Murcia.
43. **Policlínica Guipúzcoa.** San Sebastián. Guipúzcoa.
44. **Hospital Casa de Salud.** Valencia.
45. **Hospital Universitario Infanta Cristina.** Badajoz.
46. **Hospital Clínico Universitario de Salamanca.** Salamanca.
47. **Hospital Modelo.** La Coruña.
48. **Hospital de la Ribera.** Alzira. Valencia.
49. **Hospital de Bellvitge.** Hospitalet del Llobregat. Barcelona.
50. **Hospital Clinic i Provincial.** Barcelona.
51. **Hospital Vall d’Hebrón. (Adultos).** Barcelona.
52. **Hospital Materno Infantil Vall d’Hebrón**. Barcelona.
53. **Hospital Universitario Virgen de la Macarena.** Sevilla.
54. **Hospital universitario de Cruces.** Baracaldo. Vizcaya.
55. **Hospital del Vinalopó.** Alicante.
56. **Complejo Hospitalario Universitario A Coruña.** Coruña.
57. **Hospital Universitario Marqués de Valdecilla.** Santander.
58. **Clínica Universidad de Navarra.** Pamplona. Navarra.
59. **Hospital Universitario Virgen de las Nieves.** Granada.
60. **Hospital Universitario Reina Sofía (Adultos e Infantil).** Córdoba.
61. **Hospital Universitario Puerta del Mar.** Cádiz.
62. **Hospital 12 de Octubre. (Infantil).** Madrid.
